# Supplementary material
Source: PubMed Central journal article supplement (PMC2852685)
Supplement: NIHMS179905-supplement-01.pdf [file NIHMS179905-supplement-01.pdf]

Chimpanzee EADHMPPSRISAAATFIQHECFQ  
 Dog DADHTPPPISRISAAATFIQHECFQ  
 Horse DADHVPPSRISAAATFIQHECFQ  
 Mouse DADHVPVSKISAAATFIQHESFQ  
 Opossum DSDNTPASRIQAAATFIQHECFQ

..\*: ..\* \*\*\*\*\* \*\*

R388W

Human IQHECFQKSEARKRVNQLRGILK  
 Chimpanzee IQHECFQKSEARKRVNQLRGIPK  
 Dog IQHECFQKSEARKRVNQLRGIPK  
 Horse IQHECFQKSEARKRVHQLRGIPR  
 Mouse IQHESFQKSEARKRVNQLRGIPK  
 Opossum IQHECFQKSEARKRVHHLRGIPK

\*\*\*\* \*\*\*\*\*..\*\*\*\* :

I531S

|            |                         |
|------------|-------------------------|
| Human      | ITEALLTLTENIIPFSGWPEGD  |
| Chimpanzee | ITEALLTLTENIIPFSGWPEGD  |
| Dog        | ITEALLILTENIIPFSGWPEGD  |
| Horse      | ITEALLILNENIIPFSGWPEGD  |
| Mouse      | ITEALLTLTESVIIPFSGWPEGD |
| Opossum    | ITEALLTLTDSVIIPYSGWSEGD |

\*\*\*\*\* \* . .\*\*\*\*\* \*\*  
 .... . . .

L787F

|            |                        |
|------------|------------------------|
| Human      | SIIPDTPSTDLLIETTASACYT |
| Chimpanzee | SIIPDTPSTDLLIETTASACYT |
| Dog        | SIIPDTPSTDLLIETTASACYT |
| Horse      | SIIPDTPSTDLLIETTASACYT |
| Mouse      | SIIPDTPSTDLLIETTASACYT |
| Opossum    | SIIPDTPNSDLLIETTASACYT |

\*\*\*\*\* .\*\*\*\*\*  
 ..

**Supplemental Figure 1. PKP2 mutations in conserved sequences.** The identified missense substitutions (S140F, S209R, A372P, R388W, I531S, L787F) in PKP2 resulted in changes at residues that are conserved (identity or in the same group) between species.
